# Supplementary material for: Homogeneous bulk heterojunction domains with continuous charge pathway via hydrophobic membrane filtration for stable photo and dark current operations
Source: Royal Society of Chemistry journal article supplement (doi:10.1039/d4tc03054k), 2024-01-01
Supplement: d4tc03054k1.pdf [file d4tc03054k1.pdf]

Electronic Supplementary Information

**Homogeneous Bulk Heterojunction Domains with Continuous Charge Pathway via Hydrophobic Membrane Filtration for Stable Photo and Dark Current Operations**

*Hyunguk Park,<sup>‡a</sup> Jihyun Lim,<sup>‡b</sup> Byung Gi Kim,<sup>b</sup> Woongsik Jang,<sup>b</sup> and Dong Hwan Wang<sup>\*ab</sup>*

<sup>a</sup>School of Integrative Engineering, Chung-Ang University, 84 Heukseok-ro, Dongjak-gu, Seoul 06974, Republic of Korea

<sup>b</sup>Department of Intelligent Semiconductor Engineering, Chung-Ang University, 84 Heukseok-ro, Dongjak-gu, Seoul 06974, Republic of Korea

---

\* Corresponding authors, E-mail addresses: king0401@cau.ac.kr (Prof. D.H. Wang)

<sup>‡</sup> These authors contributed equally.

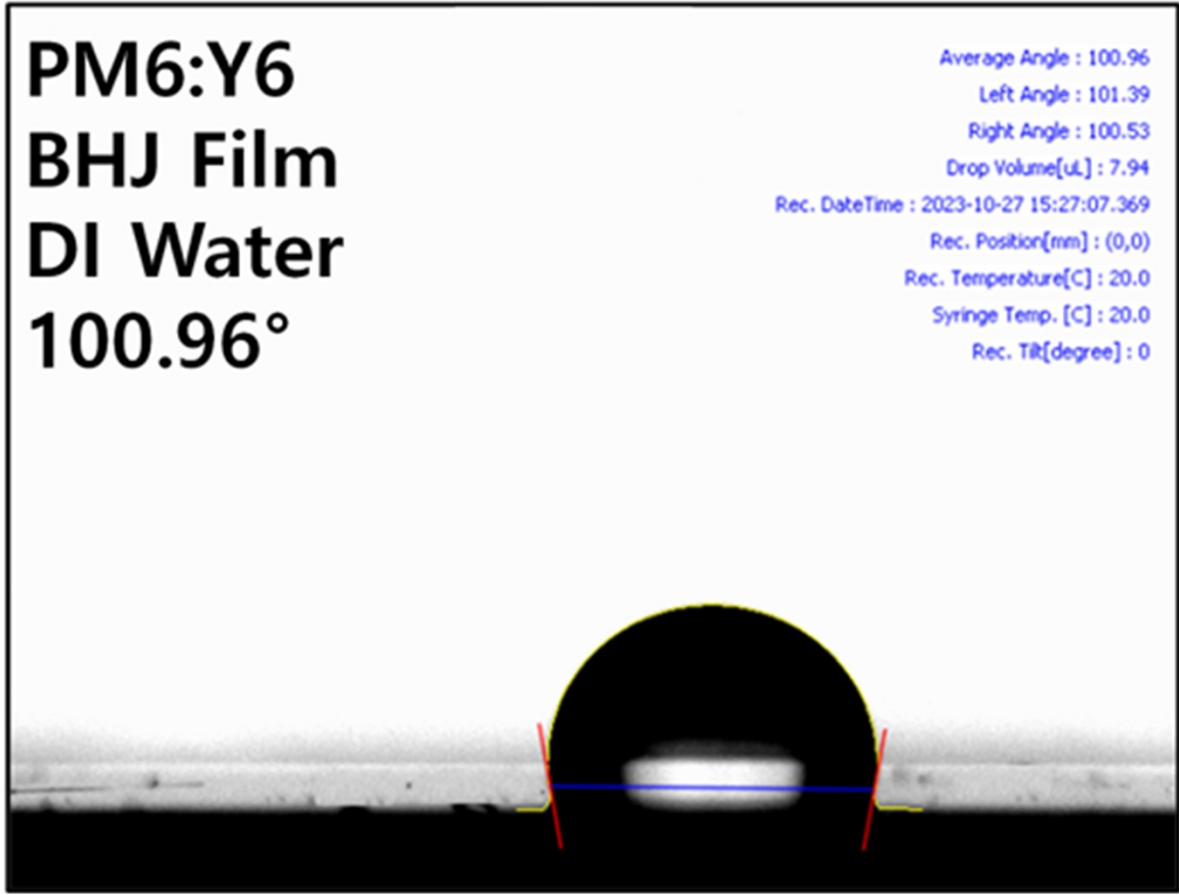

**Fig. S1.** Contact angle image of the PM6:Y6 BHJ film.

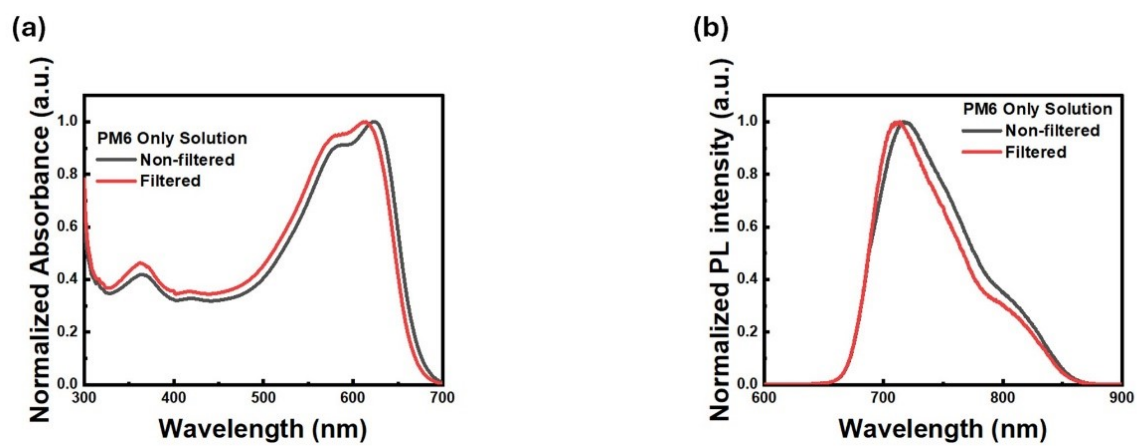

**Fig. S2.** Normalized (a) absorbance and (b) PL intensity spectra of the PM6 solutions with hydrophobic filtration.

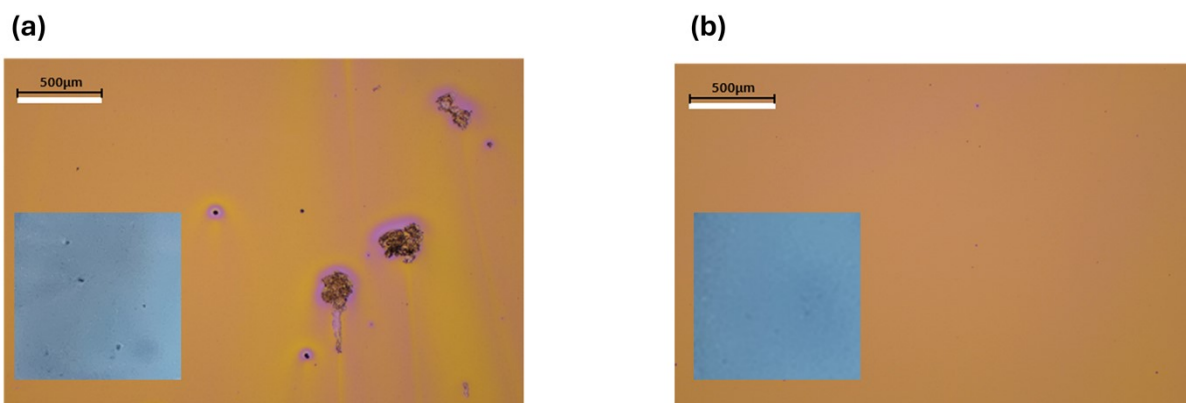

**Fig. S3.** Optical microscopy images of the (a) non-filtered and (b) filtered PM6:Y6 BHJ films (inset: image of the as-cast films).

(a)

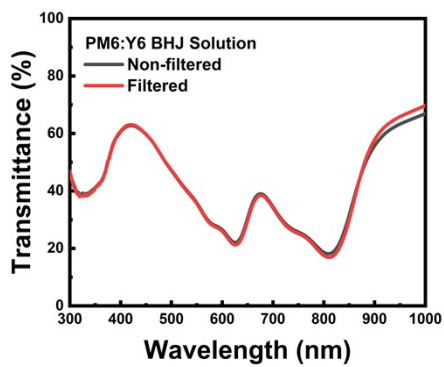

(b)

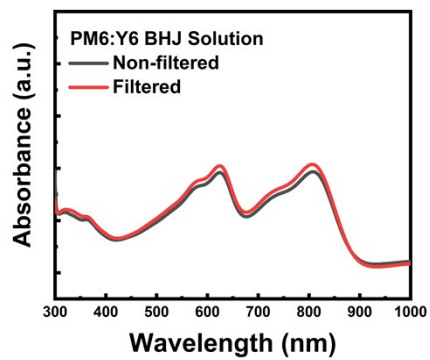

**Fig. S4.** (a) Transmittance and (b) absorbance spectra of the PM6:Y6 BHJ films with BHI hydrophobic filtration.

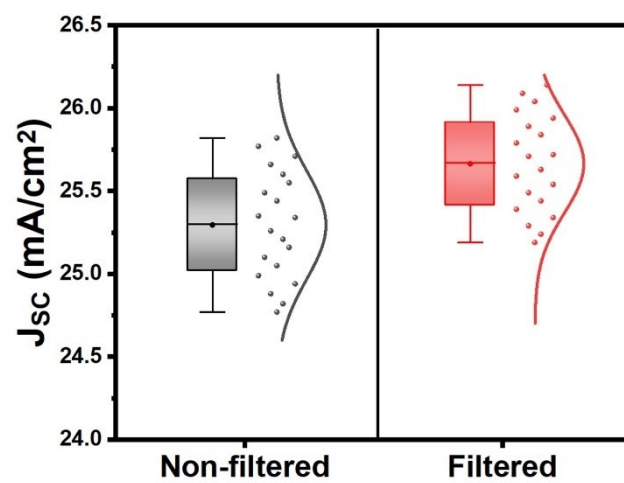

**Fig. S5.** Variation of the  $J_{SC}$  of OPV at 120.0 klux upon hydrophobic filtration.

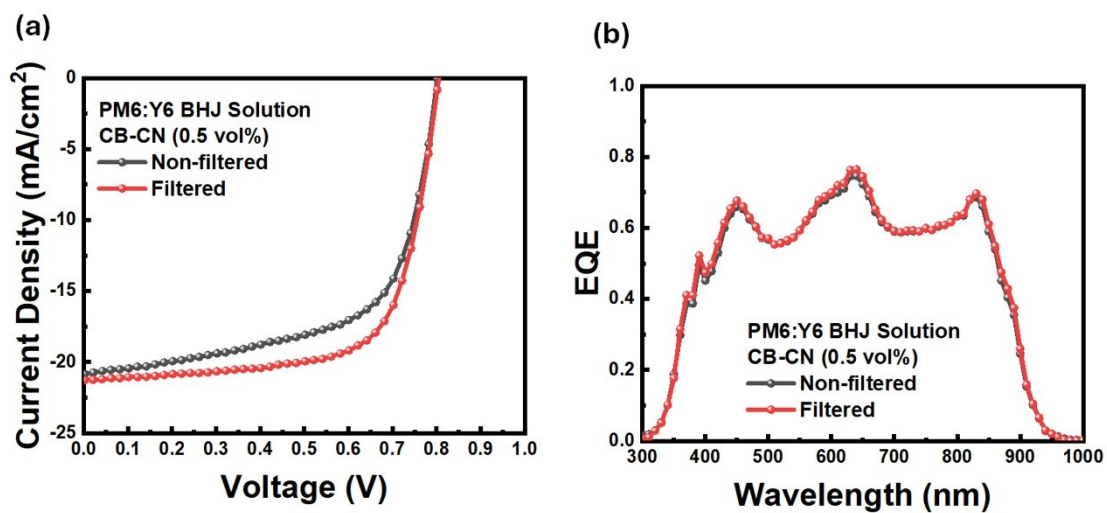

**Fig. S6.** J–V characteristics of CB-CN (0.5%) based OPV with filtration under 120.0 klux illumination.

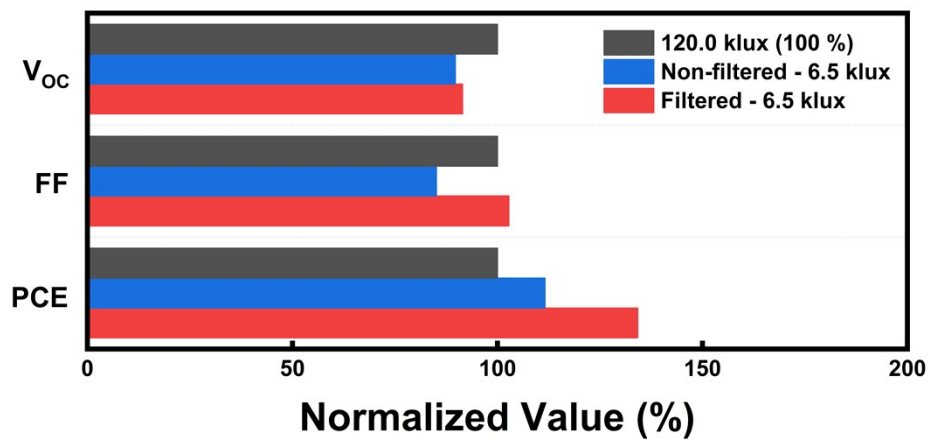

**Fig. S7.** Variation of the OPV parameters at 6.5 klux upon hydrophobic filtration:  $V_{oc}$ , FF and PCE values normalized by 120.0 klux devices.



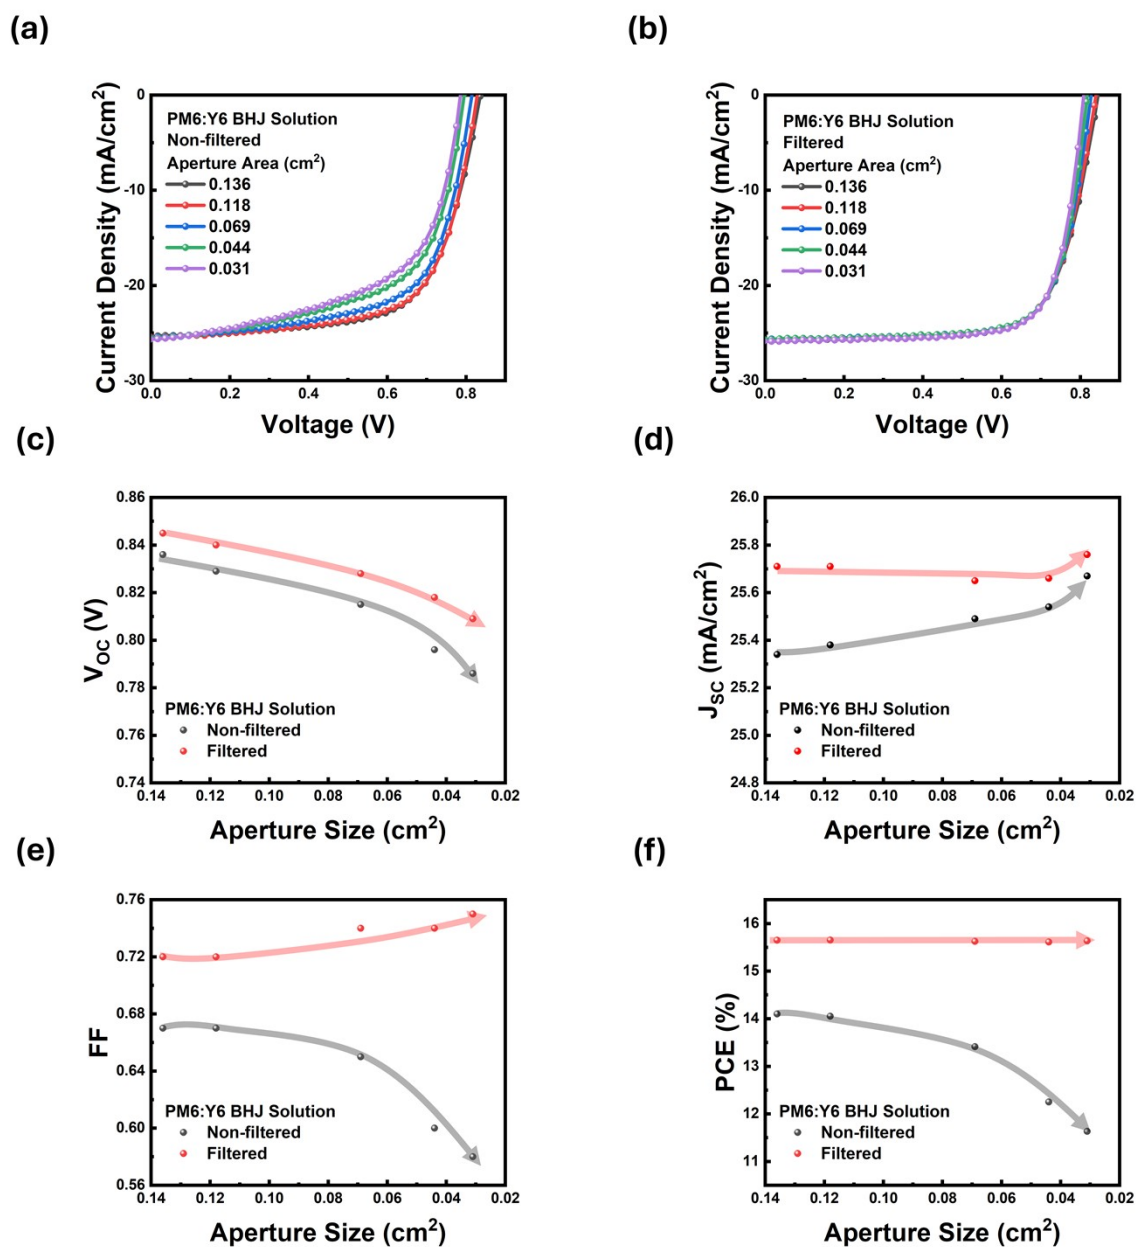

**Fig. S8.** Photovoltaic characteristics of the non-filtered and filtered devices with a photoactive layer area of (a) 0.031, (b) 0.044, (c) 0.069, and (d) 0.118  $\text{cm}^2$ . Variation of the (e)  $V_{OC}$ , (f)  $J_{SC}$ , (g) FF, and (h) PCE of the OPVs with different photoactive areas.

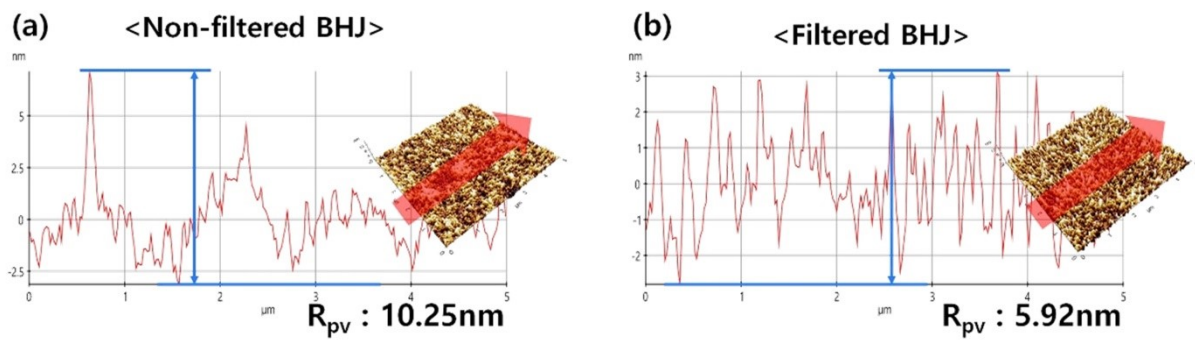

**Fig. S9.** Line profile and peak-to-valley value from AFM Height image of (a) non-filtered and (b) filtered BHJ film. (inset: direction of line profile)

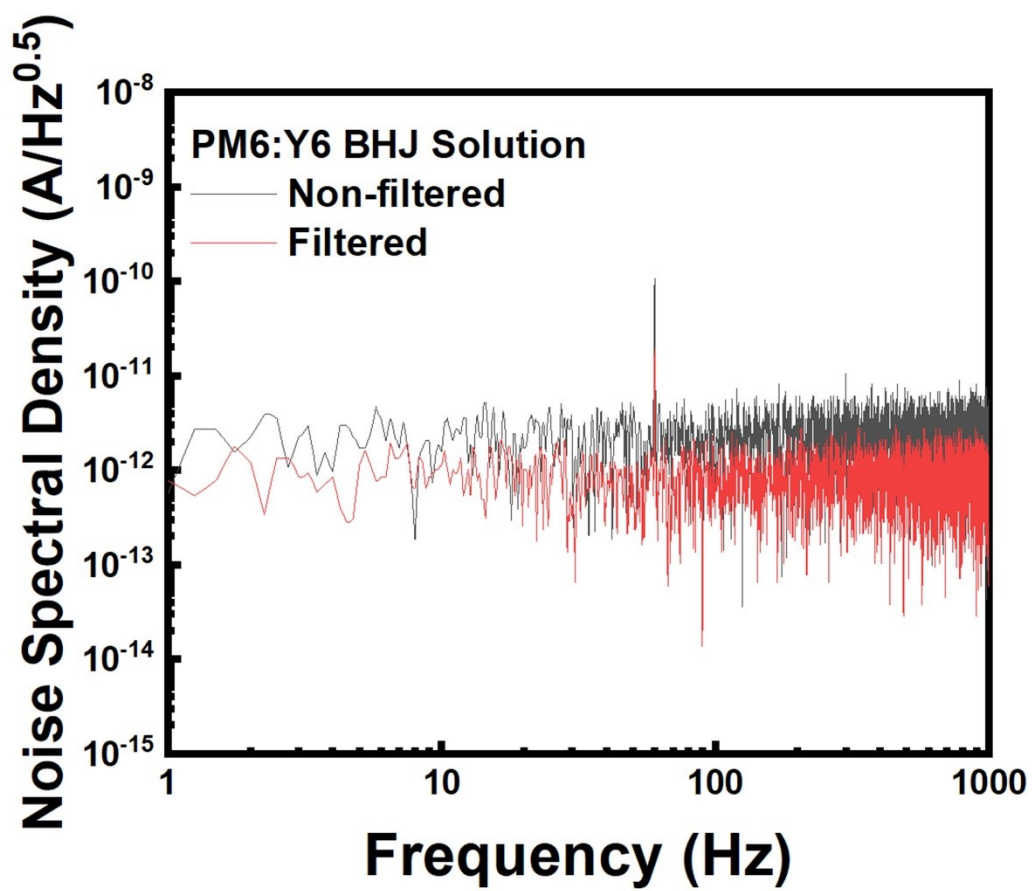

Fig. S10. The noise spectral density of the non-filtered and filtered OPD devices.

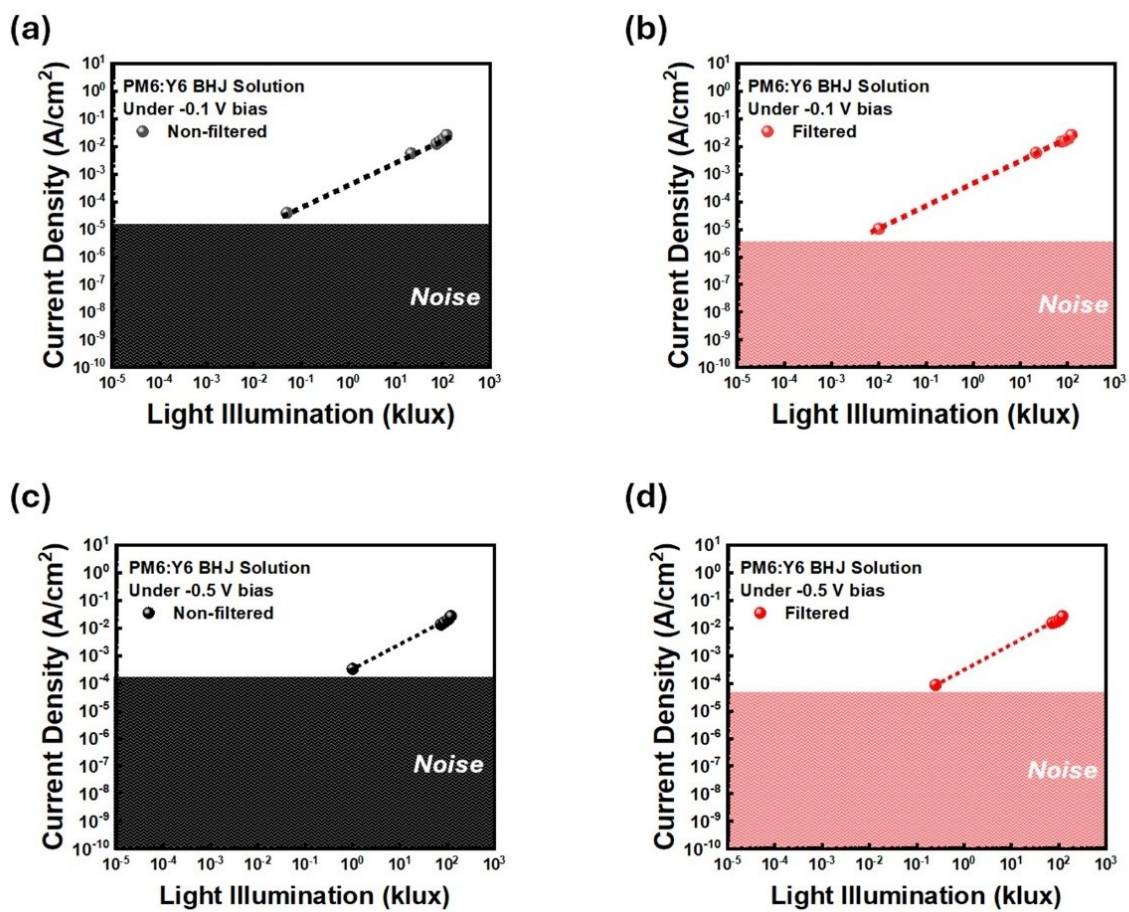

**Fig. S11** LDR of the OPD devices under  $-0.1$  V and  $-0.5$  V bias under various light illumination conditions for the (a), (c) non-filtered and (b), (d) filtered devices.

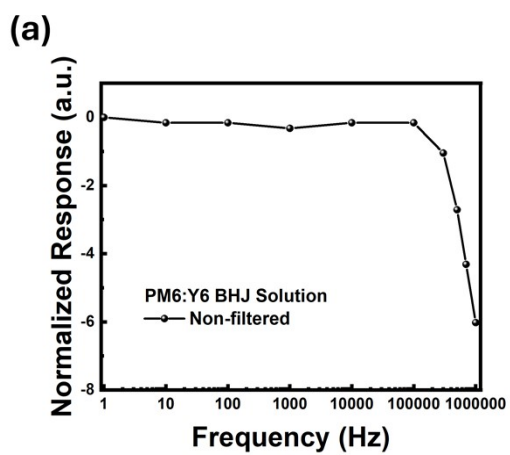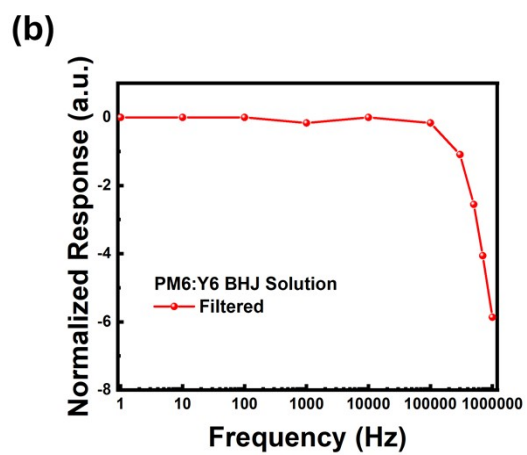

**Fig. S12.** Normalized photo-response at various frequencies of the (a) non-filtered and (b) filtered OPD devices.

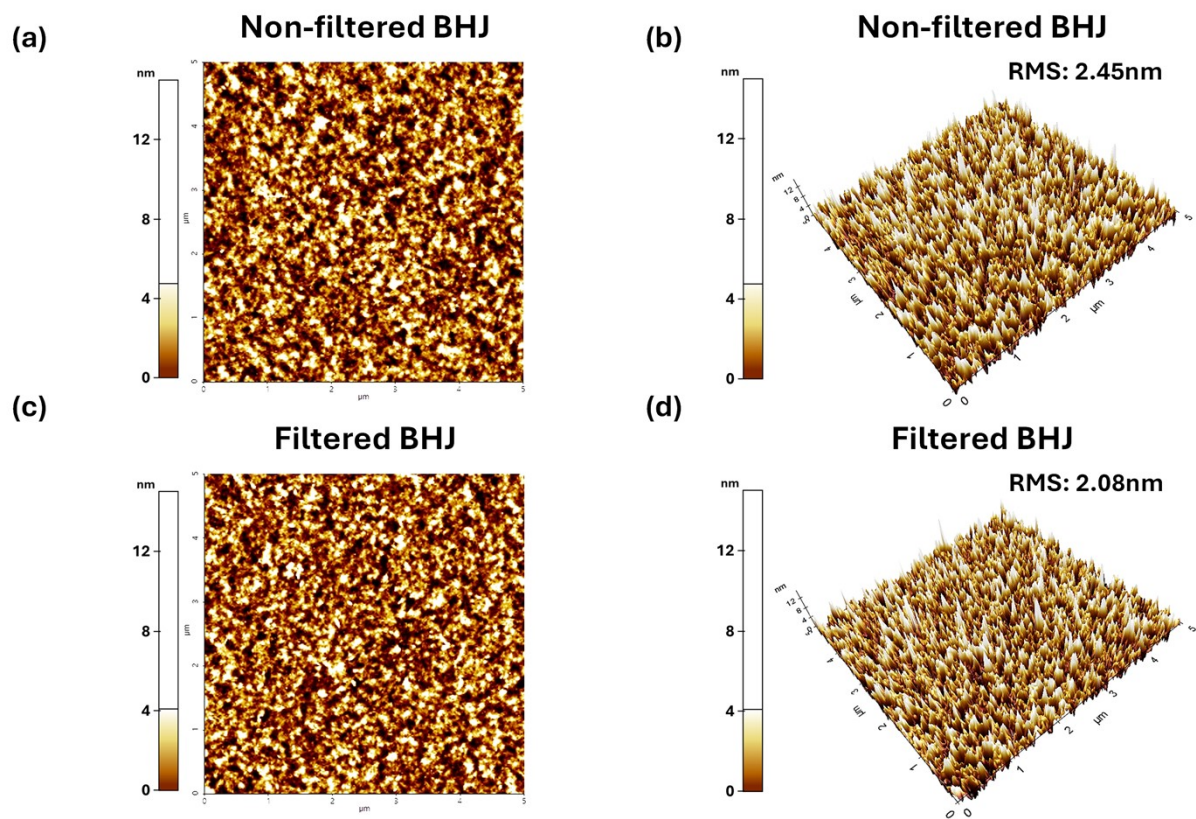

**Fig. S13.** 2D and 3D AFM height images of 480 h-aged (a), (b) non-filtered and (c), (d) filtered BHJ films.

**Table S1.** Membrane filter chemical compatibility chart of various solvents for each membrane (C: compatible, IC: incompatible, LC: limited compatible)

| <b>Solvent</b>           | <b>Membrane filter</b> |            |           |           |
|--------------------------|------------------------|------------|-----------|-----------|
|                          | <b>PTFE</b>            | <b>PES</b> | <b>CA</b> | <b>PP</b> |
| <b>Dimethylsulfoxide</b> | C                      | IC         | IC        | C         |
| <b>Methanol</b>          | C                      | C          | C         | C         |
| <b>Ethyl Ether</b>       | C                      | C          | C         | LC        |
| <b>Acetone</b>           | C                      | IC         | IC        | C         |
| <b>Chlorobenzene</b>     | C                      | LC         | C         | C         |
| <b>Chloroform</b>        | C                      | IC         | IC        | LC        |

**Table S2.** Photovoltaic parameters of CB-CN (0.5%) based OPV with filtration under 120.0

| <b>PM6:Y6 BHJ</b>       | <b>V<sub>OC</sub></b> | <b>J<sub>SC</sub></b>      | <b>J<sub>SC,EQE</sub></b>  | <b>FF</b> | <b>PCE</b> |
|-------------------------|-----------------------|----------------------------|----------------------------|-----------|------------|
| <b>Solution (CB-CN)</b> | <b>(V)</b>            | <b>(mA/cm<sup>2</sup>)</b> | <b>(mA/cm<sup>2</sup>)</b> |           | <b>(%)</b> |
| <b>Non-filtered</b>     | 0.802                 | 20.86                      | 20.17                      | 0.63      | 10.45      |
| <b>Filtered</b>         | 0.805                 | 21.27                      | 20.47                      | 0.69      | 11.86      |

klux illumination.



**Table S3.** Photovoltaic characteristics of the OPVs under 6.5 klux illumination with BHJ hydrophobic filtration.

| <b>PM6:Y6<br/>Solution</b> | <b>V<sub>oc</sub><br/>(V)</b> | <b>J<sub>sc</sub><br/>(mA/cm<sup>2</sup>)</b> | <b>FF</b> | <b>PCE<br/>(%)</b> |
|----------------------------|-------------------------------|-----------------------------------------------|-----------|--------------------|
| <b>Non-filtered</b>        | 0.750                         | 4.56                                          | 0.57      | 15.73              |
| <b>Filtered</b>            | 0.774                         | 4.56                                          | 0.74      | 20.96              |

**Table S4.** Series and shunt resistance of the OPVs under 120.0 and 6.5 klux illumination with BHJ hydrophobic filtration.

| <b>PM6:Y6</b>       | <b>Light Intensity</b> | <b>R<sub>s</sub></b>      | <b>R<sub>sh</sub></b>      |
|---------------------|------------------------|---------------------------|----------------------------|
| <b>Solution</b>     | <b>(klux)</b>          | <b>(Ω/cm<sup>2</sup>)</b> | <b>(kΩ/cm<sup>2</sup>)</b> |
| <b>Non-filtered</b> | 120.0                  | 4.35                      | 1.16                       |
|                     | 6.5                    | 17.50                     | 2.90                       |
| <b>Filtered</b>     | 120.0                  | 4.00                      | 3.71                       |
|                     | 6.5                    | 13.46                     | 10.15                      |

**Table S5.** Photovoltaic parameters of OPVs under 120.0 klux illumination for different photoactive layer areas.

| <b>PM6:Y6<br/>Solution</b> | <b>Active Area<br/>(cm<sup>2</sup>)</b> | <b>V<sub>oc</sub><br/>(V)</b> | <b>J<sub>sc</sub><br/>(mA/cm<sup>2</sup>)</b> | <b>FF</b> | <b>PCE<br/>(%)</b> |
|----------------------------|-----------------------------------------|-------------------------------|-----------------------------------------------|-----------|--------------------|
| <b>Non-filtered</b>        | 0.031                                   | 0.786                         | 25.07                                         | 0.58      | 11.36              |
|                            | 0.044                                   | 0.796                         | 25.10                                         | 0.60      | 12.04              |
|                            | 0.069                                   | 0.815                         | 25.05                                         | 0.65      | 13.18              |
|                            | 0.118                                   | 0.829                         | 25.16                                         | 0.67      | 13.93              |
| <b>Filtered</b>            | 0.031                                   | 0.809                         | 25.44                                         | 0.75      | 15.44              |
|                            | 0.044                                   | 0.818                         | 25.46                                         | 0.74      | 15.49              |
|                            | 0.069                                   | 0.828                         | 25.51                                         | 0.74      | 15.54              |
|                            | 0.118                                   | 0.840                         | 25.54                                         | 0.72      | 15.55              |

**Table S6.** Responsivity (R) and specific detectivity ( $D^*$ ) values under self-powered conditions from voltage-dependent curves of OPDs with hydrophobic-filtration-processed BHJ.

| <b>PM6:Y6</b>       | <b>Light illumination</b> | <b>R @0 V</b> | <b><math>D^*</math> @0 V</b> |
|---------------------|---------------------------|---------------|------------------------------|
| <b>Solution</b>     | <b>(klux)</b>             | <b>(A/W)</b>  | <b>(Jones)</b>               |
| <b>Non-filtered</b> | 120                       | 0.25          | $3.02 \times 10^{12}$        |
|                     | 6.5                       | 0.37          | $4.43 \times 10^{12}$        |
| <b>Filtered</b>     | 120                       | 0.26          | $1.04 \times 10^{13}$        |
|                     | 6.5                       | 0.37          | $1.51 \times 10^{13}$        |

**Table S7.** Calculated trap-filled limited voltage ( $V_{\text{TFL}}$ ) and trap density ( $N_t$ ) of the optoelectronic devices with hydrophobic filtration.

| <b>PM6:Y6</b>       | <b><math>V_{\text{TFL}}</math></b> | <b><math>N_t</math></b>   |
|---------------------|------------------------------------|---------------------------|
| <b>Solution</b>     | <b>(V)</b>                         | <b>(#/cm<sup>3</sup>)</b> |
| <b>Non-filtered</b> | 0.132                              | $3.62 \times 10^{15}$     |
| <b>Filtered</b>     | 0.117                              | $3.21 \times 10^{15}$     |

**Table S8.** -3 dB frequency of the OPD devices with hydrophobic filtration.

| <b>PM6:Y6</b>       | <b>-3 dB frequency</b> |
|---------------------|------------------------|
| <b>Solution</b>     | <b>(kHz)</b>           |
| <b>Non-filtered</b> | 537                    |
| <b>Filtered</b>     | 545                    |
